1 Rare alternative second line injectable drug resistance markers  
2 identified by gene-wise genome wide association in *M.*  
3 *tuberculosis* with unexplained resistance

4 Authors: Derek Conkle-Gutierrez<sup>1</sup>, Calvin Kim<sup>1</sup>, Sarah M. Ramirez-Busby<sup>1</sup>, Samuel J. Modlin<sup>1</sup>,  
5 Mikael Mansjö<sup>2</sup>, Jim Werngren<sup>2</sup>, Leen Rigouts<sup>3,4</sup>, Sven E. Hoffner<sup>1,5</sup>, Faramarz Valafar<sup>1\*</sup>

6 Affiliations:

7 <sup>1</sup> Laboratory for Pathogenesis of Clinical Drug Resistance and Persistence (LPCDRP),  
8 Biomedical Informatics Research Center, Division of Epidemiology, School of Public Health,  
9 San Diego State University

10 <sup>2</sup> Department of Microbiology, Public Health Agency of Sweden, Solna, Sweden.

11 <sup>3</sup> Department of Biomedical Sciences, Antwerp University (UA), Antwerp, Belgium

12 <sup>4</sup> Mycobacteriology Unit, Department of Biomedical Sciences, Institute of Tropical Medicine  
13 (ITM), Antwerp, Belgium

14  
15 <sup>5</sup> Department of Global Public Health, Karolinska Institute, Stockholm, Sweden

16 \* Corresponding Author: [faramarz@sdsu.edu](mailto:faramarz@sdsu.edu)

17

## 18 Abstract

19 Point mutations in the *rrs* gene and *eis* promoter are known to confer resistance to  
20 second-line injectable drugs (SLIDs) amikacin (AMK), capreomycin (CAP), and kanamycin  
21 (KAN). While mutations in these canonical genes confer a majority of SLID-resistance,  
22 alternative mechanisms of resistance are not uncommon and threaten effective treatment  
23 decisions when using conventional molecular diagnostics. In total, 1184 clinical *M. tuberculosis*  
24 isolates from 7 countries were studied for genomic markers associated with phenotypic  
25 resistance. The markers *rrs*:A1401G and *rrs*:G1484T were associated with resistance to all three  
26 SLIDs, and three known markers in the *eis* promoter (*eis*:G-10A, *eis*:C-12T, and *eis*:C-14T) were  
27 similarly associated with kanamycin resistance (KAN-R). Among 325, 324, 270 AMK-R, CAP-  
28 R, and KAN-R isolates, 264 (81.2%), 250 (77.2%), and 249 (92.3%) harbored canonical  
29 mutations, respectively. Thirteen isolates harbored more than one canonical mutation. Canonical  
30 mutations did not account for 111 of the phenotypically resistant isolates. A gene-wise method  
31 identified three genes and promoters with mutations that, on aggregate, associated with  
32 unexplained resistance to at least one SLID. Our analysis associated *whiB7* promoter mutations  
33 with KAN resistance, supporting clinical relevance for the previously demonstrated role of  
34 *whiB7* overexpression in KAN resistance. We also provide evidence for the novel association of  
35 *ppe51* (a gene previously associated with various antimicrobial compounds) with AMK  
36 resistance, and for the novel association of *thrB* with AMK and CAP resistance. The use of gene-  
37 wise association can provide additional insight, and therefore is recommended for identification  
38 of rare mechanisms of resistance when individual mutations carry insufficient statistical power.

39

40

## 41 **Introduction**

42 Tuberculosis (TB) remains a constant global public health threat due to rising cases of  
43 drug resistance among various strains of *Mycobacterium tuberculosis*. Half a million estimated  
44 TB cases were rifampicin resistant in 2020, including 3-4% of new TB cases and 18-21% of  
45 previously treated cases<sup>1</sup>. This trend is exacerbated in countries of the former Soviet Union,  
46 where over half of previously treated TB patients were rifampicin resistant<sup>1</sup>. In 2018, 78% of  
47 rifampicin resistant cases were also resistant to isoniazid, making them multidrug resistant  
48 tuberculosis (MDR-TB)<sup>2</sup>. In 2018, an estimated 6.2% of MDR-TB cases were extensively drug  
49 resistant (XDR), then defined as MDR-TB strains that were additionally resistant to at least a  
50 fluoroquinolone and a second-line injectable drug<sup>2</sup> (SLID).

51 Successful Tuberculosis treatment relies on early identification and effective regimens,  
52 which can be ensured by rapid and accurate drug-susceptibility testing (DST) to identify  
53 potential MDR-TB cases. MDR-TB should be treated with combinations of drugs shown *in vitro*  
54 to be effective<sup>3</sup>. Phenotypic DST takes weeks, during which time patients may face ineffective  
55 treatment regimens with often debilitating side effects. Molecular diagnostics in contrast can be  
56 performed rapidly. As these rely on genetic markers of resistance, to improve their accuracy we  
57 must understand the mechanisms behind the resistance and comprehensively identify all their  
58 markers.

59 The SLIDs amikacin (AMK) and kanamycin (KAN) kill *M. tuberculosis* cells by binding  
60 to the 16S ribosomal subunit and by disrupting translation<sup>4</sup>. The bactericidal mechanism of the  
61 SLID capreomycin (CAP) is less understood. It is hypothesized to bind to the 70S ribosomal  
62 subunit and limit mRNA-tRNA translocation<sup>5</sup>. In 2018, the WHO recommended against the use  
63 of CAP or KAN due to their side effects, such as ototoxicity and nephrotoxicity<sup>6</sup>, and their

64 significant association with treatment failure<sup>7</sup>. Even though AMK is now being phased out in  
65 favor of bedaquiline<sup>8</sup>, it is still widely used. Although CAP and KAN are currently not  
66 recommended in treatment regimens, understanding mechanisms of resistance to these drugs can  
67 inform and corroborate our understanding of AMK-resistance (AMK-R), as the three drugs have  
68 similar mechanisms of action.

69 Genetic markers can rapidly identify SLID-resistance (SLID-R) in clinical isolates<sup>9</sup>.  
70 Across multiple studies, the most frequently observed SLID-R marker within the *M. tuberculosis*  
71 complex is *rrs*:A1401G<sup>10-13</sup>. This single nucleotide polymorphism (SNP) in the 16S ribosomal  
72 RNA (rRNA) gene *rrs* typically causes cross-resistance to all three SLIDs<sup>11,13</sup>. Other mutations  
73 in *rrs* also associate with SLID-R, but are far more rare<sup>14</sup>.

74 While *rrs*:A1401G typically causes resistance to all three SLIDs, not all isolates resistant  
75 to one or more SLIDs have this marker<sup>11</sup>. Many KAN-resistant (KAN-R) isolates, for example,  
76 harbor variants in the promoter of *eis*<sup>11,15,16</sup>. The *eis* gene encodes an N-acetyltransferase, which  
77 can inactivate KAN when overexpressed<sup>15</sup>. Spectrophotometric assays have further shown that  
78 *eis* acetylates KAN<sup>17</sup>. These *eis* promoter markers are common in *M. tuberculosis* strains from  
79 the former Soviet Union, where the use of KAN has been high<sup>16</sup>. Together with *rrs*:A1401G and  
80 *rrs*:G1484T, these known markers (Table 1) explain most SLID-R *M. tuberculosis* isolates<sup>18</sup>.

81 **Table 1. The known SLID-R markers in *M. tuberculosis*.** This set of mutations was derived from a  
82 previous study<sup>18</sup>, and used to determine the expected resistance of clinical isolates to AMK, CAP, and  
83 KAN.

| Antibiotic | Known Markers                                                                                     |
|------------|---------------------------------------------------------------------------------------------------|
| AMK        | <i>rrs</i> :A1401G, <i>rrs</i> :G1484T                                                            |
| CAP        | <i>rrs</i> :A1401G, <i>rrs</i> :G1484T                                                            |
| KAN        | <i>rrs</i> :A1401G, <i>rrs</i> :G1484T<br><i>eis</i> :G-10A, <i>eis</i> :C-12T, <i>eis</i> :C-14T |

84

85 Previous studies have found SLID-R isolates with no known markers<sup>11,13</sup>. Mutations in  
86 several genes have been suggested to cause resistance in these isolates, including *tlyA*<sup>19</sup>, *whiB7*<sup>20</sup>,  
87 *vapC21*<sup>21</sup>, and *bfrB*, also known as *ferritin*<sup>22,23</sup>. Knockout variants in *tlyA* induce CAP resistance  
88 (CAP-R) *in vitro*<sup>5</sup>. Loss-of-function mutations in *tlyA*<sup>5,18,19</sup> are proposed to prevent CAP from  
89 binding to the 16S subunit<sup>19</sup> by preventing methylation of the 16S<sup>24</sup>.

90 To find alternative mechanisms of SLID-R, we performed a genome wide association  
91 study (GWAS) on 1184 clinical *M. tuberculosis* isolates, including 111 SLID-R isolates with no  
92 known SLID-R markers. Our methods corroborated the association of *whiB7* with kanamycin  
93 resistance, and identified several putative amikacin resistance markers in *ppe51*, a transport  
94 mediator previously implicated in resistance to drug candidate 3,3-bis-  
95 di(methylsulfonyl)propionamide<sup>25</sup>.

96

## 97 Results

98 **Table 2. Phenotypic Drug Susceptibility Testing Results.** Number of total resistant *M. tuberculosis*  
99 isolates out of all isolates with available phenotypic drug susceptibility testing (DST) for each drug, and  
100 the percentage of isolates with DST to a given drug that show resistance.

| Drug | # Resistant/#Tested | % Resistant |
|------|---------------------|-------------|
| AMK  | 325/1163            | 27.9%       |
| CAP  | 324/1159            | 27.9%       |
| KAN  | 270/496             | 54.4%       |

101

102 This study surveyed 1184 clinical isolates for injectable resistance markers. AMK and  
103 CAP phenotypic DST data were available for 1163 and 1159 isolates, respectively (Table 2).  
104 Only 496 isolates had phenotypic DST data available for KAN (Table 2). Our set of clinical  
105 isolates included 333 isolates sequenced on Single Molecule Real Time (SMRT) sequencers,  
106 which can resolve many known blind spots in the *M. tuberculosis* genome, such as in the PE and

107 PPE gene families<sup>26</sup>. The isolates were categorized based on phenotypic DST and the presence of  
108 known resistance markers.

### 109 *Mutations in rrs and eis Promoter Associate with SLID Resistance and Specific Lineages*

110 Known SLID-R markers in the *rrs* gene and *eis* promoter associated strongly with  
111 resistance (Table 3). They predicted SLID-R with similar sensitivity to a 2018 GWAS study<sup>27</sup>,  
112 though the sensitivity was lower than in earlier studies<sup>5,18</sup>. The lower sensitivity is likely due to  
113 the deliberate selection of clinical isolates with discordant genotypes and phenotypes. Variant  
114 *rrs*:A1401G was the most frequent marker (N = 260, Table 4), while *rrs*:G1484T was the least  
115 frequent (N = 4, Table 4). However, no isolate with *rrs*:G1484T was susceptible to any SLID  
116 they were tested for (Table 4). The known marker *rrs*:A1401G was more frequent (181/700)  
117 within Lineage 2 (East-Asian) than within any other lineage (Figure 1, Table S1).

118 **Table 3. Sensitivity and specificity of SLID-R prediction with known markers.** A 95% confidence  
119 interval for each estimate was calculated using the score method with continuity correction<sup>28</sup>. Isolates  
120 with genotypic-phenotypic concordance were classified as “explained”. Otherwise, they are  
121 “unexplained”.

| Drug | Explained Resistant | Explained Susceptible | Unexplained Resistant | Unexplained Susceptible | Sensitivity (% [95% CI]) | Specificity (% [95% CI]) |
|------|---------------------|-----------------------|-----------------------|-------------------------|--------------------------|--------------------------|
| AMK  | 264                 | 829                   | 61                    | 9                       | 81.2<br>(78.8 - 83.4)    | 98.9<br>(98.1 - 99.4)    |
| CAP  | 250                 | 813                   | 74                    | 22                      | 77.2<br>(74.6 - 79.5)    | 97.4<br>(96.2 - 98.2)    |
| KAN  | 249                 | 223                   | 21                    | 3                       | 92.3<br>(89.6 - 94.4)    | 98.7<br>(97.1 - 99.4)    |

122

123 Ten unexplained AMK-R isolates could be explained by the *eis* promoter mutation C-  
124 14T. The mutation was carried by 11 AMK-R and 18 AMK-S isolates (Table 3). Ten of the  
125 AMK-R isolates with *eis*:C-14T carried no SLID-R marker in *rrs* (Table 3, S2). Another three

126 unexplained AMK-R isolates had evidence of heteroresistance, with *rrs*:A1401G supported by  
 127 10-20% of the mapped reads (Table S3). No unexplained AMK-R isolates had reads supporting  
 128 *rrs*:G1484T.

129 **Table 4. Number of *M. tuberculosis* isolates with each known marker.** Isolates are classified based on  
 130 their resistance or susceptibility to each SLID. R=resistant; S=sensitive. Note that some isolates carried  
 131 multiple markers.

| Variant            | AMK-R | AMK-S | CAP-R | CAP-S | KAN-R | KAN-S |
|--------------------|-------|-------|-------|-------|-------|-------|
| <i>rrs</i> :A1401G | 260   | 9     | 246   | 22    | 188   | 1     |
| <i>rrs</i> :G1484T | 4     | 0     | 4     | 0     | 3     | 0     |
| <i>eis</i> :G-10A  | 5     | 49    | 3     | 51    | 10    | 0     |
| <i>eis</i> :C-12T  | 10    | 95    | 19    | 84    | 42    | 2     |
| <i>eis</i> :C-14T  | 11    | 18    | 3     | 26    | 10    | 0     |

132

133 **Table 5. Geographic specificity of KAN Resistance markers in *eis* promoter.** Contingency tables  
 134 reporting the association between possession of a known KAN-R marker in the *eis* promoter and  
 135 collection from Moldova, stratified by KAN DST. Two Moldovan isolates had low sequencing coverage  
 136 in the *eis* promoter, and were thus excluded from this contingency table, and all KAN analysis. The  
 137 number of isolates with either of the SLID-R markers *rrs*:A1401G and *rrs*:G1484T are included in  
 138 parenthesis.

| Number of Kanamycin-Resistant Isolates      |           |              |            |
|---------------------------------------------|-----------|--------------|------------|
|                                             | Moldovan  | Not Moldovan | Totals     |
| Carries Known Marker in <i>eis</i> Promoter | 48 (2)    | 13 (1)       | 61 (3)     |
| No Known Marker in <i>eis</i> Promoter      | 24 (21)   | 185 (170)    | 209 (191)  |
| <b>Totals</b>                               | <b>72</b> | <b>198</b>   | <b>270</b> |
| Number of Kanamycin-Susceptible Isolates    |           |              |            |
|                                             | Moldovan  | Not Moldovan | Totals     |
| Carries Known Marker in <i>eis</i> Promoter | 2         | 0            | 2          |
| No Known Marker in <i>eis</i> Promoter      | 13        | 211          | 224        |
| <b>Totals</b>                               | <b>15</b> | <b>211</b>   | <b>226</b> |

139 Mutations in the *eis* promoter were especially common in isolates from Moldova (Table  
140 5). Among the 270 KAN-R isolates, isolates with known KAN-R markers in the *eis* promoter  
141 were 27.8 times more likely to be from Moldova than isolates without known markers in the *eis*  
142 promoter (95% CI 12.8-64.8, p-value < 2.2e-16, Fisher's Exact Test, Table 5). The 89 isolates  
143 from Moldova belonged exclusively to Lineage 4 (Euro-American, n = 51) and East-Asian (n =  
144 38). Similarly, among all 1184 isolates, the only isolates with variant *eis*:C-12T were East-Asian  
145 (54/700) or Euro-American (53/350, Figure 1). Two isolates carried both *eis*:C-12T and another  
146 known marker in the *eis* promoter (Table S2). Ten isolates with known markers in the *eis*  
147 promoter also carried the marker *rrs*:A1401G (Table S2).

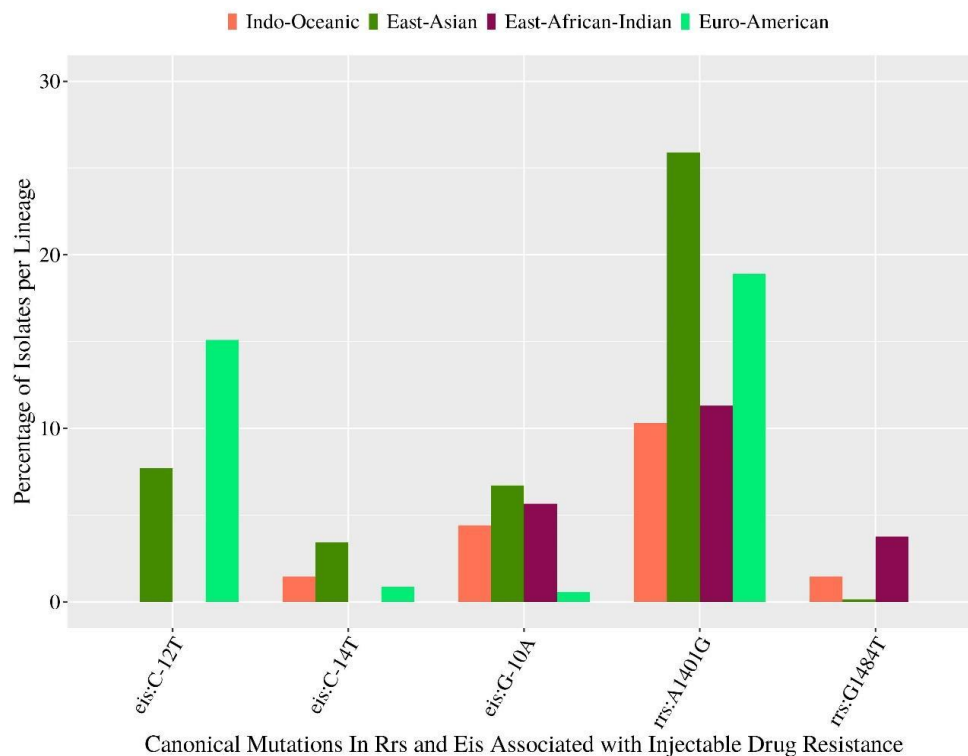

148 Canonical Mutations In Rrs and Eis Associated with Injectable Drug Resistance

149 **Figure 1. Frequency of known resistance markers within each lineage among 1184 clinical *M.***  
150 ***tuberculosis* isolates.** The Y-axis represents the percent of clinical *M. tuberculosis* isolates from each  
151 lineage that possess the mutations represented on the X-axis. The lineage of 12 isolates could not be  
152 determined, including one isolate with *eis*:C-14T, and one isolate with *rrs*:A1401G. One other isolate  
153 belonged to the *M. africanum* species, West African 1 lineage.

154



155 *Mutations rrs:A1401G and rrs:G1484T Associate with Cross-Resistance*

156 Phenotypic DST results were available for all three SLIDs in 476 isolates, of which 193  
157 isolates were resistant to all three drugs (Figure 2). Known marker *rrs:A1401G* explained 181 of  
158 the 193 cross-resistant isolates (Table 6). Of the remaining twelve cross-resistant isolates without  
159 *rrs:A1401G*, three isolates had known marker *rrs:G1484T* (Table 6). No isolate had both  
160 *rrs:A1401G* and *rrs:G1484T* (Table S2).

161 The known marker *rrs:A1401G* did not always confer full cross-resistance. Four isolates  
162 with *rrs:A1401G* were AMK-R and KAN-R, yet CAP-S (Table 6). In total, 22 isolates with  
163 *rrs:A1401G* were CAP-S (Table 4). All 22 of these CAP-discordant isolates were AMK-R  
164 (KAN DST was not available for 18 of them).

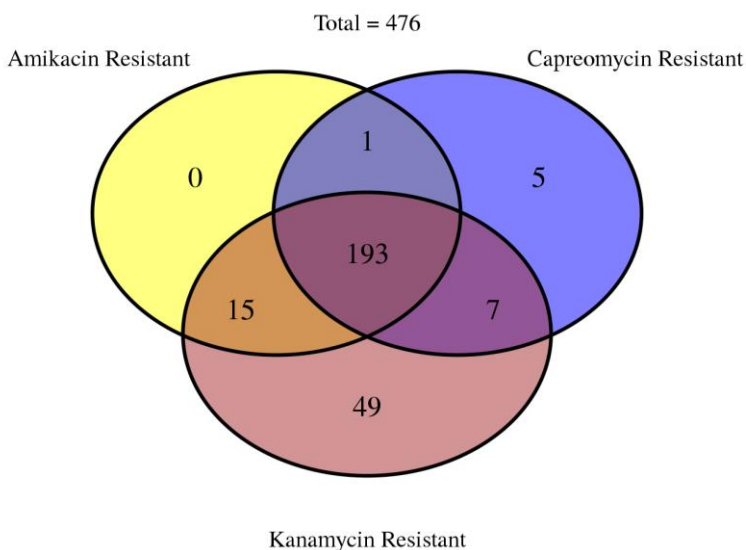

165

166 **Figure 2. Cross resistance among Second-line Injectable Drugs (SLIDs).** Venn Diagram reporting the  
167 number of *M. tuberculosis* clinical isolates with overlapping resistance across all three SLIDs. Only the  
168 476 isolates with phenotypic DST results for all three SLIDs were included in this figure.

169 Isolates with full SLID cross-resistance harbored known markers 97.45 (95% CI 43.26-  
170 2258.38, p-value < 2.2e-16, Fisher's Exact Test) times more often than isolates without full  
171 cross-resistance (Table 6, Table S4). While no isolate was mono-resistant to AMK, one isolate

172 was simultaneously AMK-R, CAP-R, and KAN-S (Figure 2, Table 6). This abnormal resistance  
 173 profile may be the result of a mistake in phenotypic DST. The isolate carried a single *rrs* variant,  
 174 *rrs*:C492T, a mutation present in another eighteen isolates, all susceptible to all three SLIDs  
 175 (Figure 3). Fifteen isolates were AMK-R, KAN-R and CAP-S, of which four carried  
 176 *rrs*:A1401G, eight carried markers in the *eis* promoter, and three carried no known markers  
 177 (Figure 2, Table 6).

178 **Table 6. Association of SLID-R profiles to known resistance markers.** Each row represents one of the  
 179 eight possible resistance profiles to the three SLIDs. The columns under *rrs* and *eis* promoter report the  
 180 number of isolates carrying each known SLID-R marker with each resistance profile. As the matrix is  
 181 sparse, cells with nonzero values are highlighted. The “No Known Markers” column reports the number  
 182 of isolates carrying no known SLID-R marker, with each drug resistance profile. Only the 476 isolates  
 183 with phenotypic DST results for all three SLIDs were included in these counts. Note that 3 of these  
 184 isolates carried multiple known markers, all of them fully SLID cross-resistant.

| Resistance Profile<br>R = resistant<br>S = susceptible |     |     | Gene       |        |                     |       |       | No Known Markers | Total |
|--------------------------------------------------------|-----|-----|------------|--------|---------------------|-------|-------|------------------|-------|
|                                                        |     |     | <i>rrs</i> |        | <i>eis</i> promoter |       |       |                  |       |
| AMK                                                    | KAN | CAP | A1401G     | G1484T | G-10A               | C-12T | C-14T |                  |       |
| R                                                      | R   | R   | 181        | 3      | 0                   | 4     | 1     | 7                | 193   |
| R                                                      | S   | R   | 0          | 0      | 0                   | 0     | 0     | 1                | 1     |
| R                                                      | R   | S   | 4          | 0      | 1                   | 0     | 7     | 3                | 15    |
| R                                                      | S   | S   | 0          | 0      | 0                   | 0     | 0     | 0                | 0     |
| S                                                      | R   | R   | 0          | 0      | 0                   | 5     | 0     | 2                | 7     |
| S                                                      | S   | R   | 0          | 0      | 0                   | 0     | 0     | 5                | 5     |
| S                                                      | R   | S   | 1          | 0      | 8                   | 29    | 2     | 9                | 49    |
| S                                                      | S   | S   | 1          | 0      | 0                   | 2     | 0     | 203              | 206   |
| Total                                                  |     |     | 187        | 3      | 9                   | 40    | 10    | 230              | 476   |

186 *High Co-occurrence of rrs:A1401G with Streptomycin Resistance Marker rrs:A514C*

187 Variants *rrs*:C492T, *rrs*:C517T, and *rrs*:A514C were the most frequent non-canonical

188 *rrs* mutations among the clinical isolates (Figure 3). The three mutations did not associate with

189 resistance to any SLID. Both *rrs*:A514C and *rrs*:C517T are known streptomycin resistance

190 markers<sup>29</sup>. Variant *rrs*:A514C was frequently carried by isolates that also carried the SLID-R

191 marker *rrs*:A1401G. Among all clinical isolates, *rrs*:A514C was 6.0 times more likely to be

192 carried in isolates with *rrs*:A1401G than in isolates without *rrs*:A1401G (p-value = 2.424e-11,

193 Fisher's Exact Test).

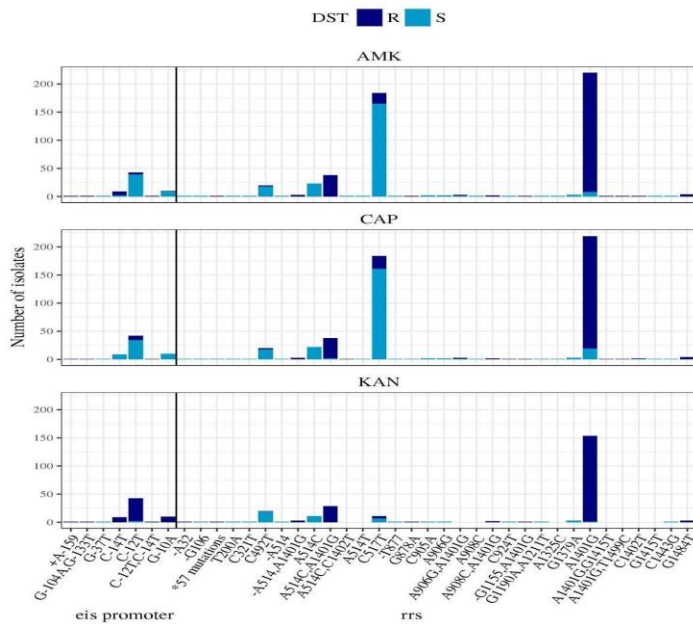

194

195 **Figure 3. Mutations in *eis* promoter and *rrs*.** Number of clinical *M. tuberculosis* isolates with mutations

196 in the *rrs* gene or *eis* promoter, with resistance or susceptibility to AMK, CAP, and KAN. Each column

197 reports the number of resistant (R, dark blue bar) and susceptible (S, light blue bar) isolates carrying each

198 mutation. For each drug, only isolates with phenotypic DST for that drug were counted. A vertical line

199 separates the mutations found in *rrs* from those in the *eis* promoter. Note that column “\*57 mutations”

200 represents a set of 57 *rrs* variants called in a single isolate, which were combined for brevity.

201

202 *Insufficient Statistical Power to Identify Individual Alternative Resistance Markers.*

203           As there were only 21 unexplained KAN-R isolates in this study (Table 3), there was  
204 insufficient statistical power to identify potential rare KAN-R mechanisms. In this isolate set,  
205 aside from known markers, no significant association was found between KAN-R and any other  
206 mutations in the *eis* promoter. While prior studies found the mutation *eis*:G-37T in isolates with  
207 at least low level resistance to KAN<sup>15,30</sup>, only one of our isolates carried it (Figure 3). This  
208 isolate was phenotypically KAN-S, though it is possible that MIC would reveal low level  
209 resistance to KAN. Similarly, the mutation *rrs*:C1402T was carried by only three isolates,  
210 including both 1 AMK-R, 1 AMK-S, 1 AMK untested, 2 CAP-R, and 1 CAP-S isolates (Figure  
211 3).

212           Mutations in the RNA methylase *tlyA* confer CAP-R *in vitro*<sup>5</sup> and have previously been  
213 observed in clinical isolates<sup>31</sup>. However, in this isolate set no significant association was found  
214 between CAP-R and any mutation in *tlyA*. Only six non-synonymous *tlyA* mutations were carried  
215 by any CAP-R isolates that did not also carry the known marker *rrs*:A1401G (Figure S1). None  
216 of these six mutations were carried by more than two CAP-R isolates (Figure S1).

217           Excluding isolates with known SLID-R markers, no individual mutation in the genome  
218 predicted resistance to any SLID with greater than 1.34% sensitivity in this isolate set (Table 7,  
219 Table S5). Several mutations were completely absent from susceptible isolates, though were only  
220 carried by at most four resistant isolates (Table 7). These mutations may be alternative SLID-R  
221 mechanisms. However due to their rarity, there was insufficient statistical power to determine  
222 this through association.

223

**Table 7. Genome wide association study, top individual variants.** The most frequent variants in ‘unexplained resistant’ isolates, SLID-R isolates that lack known resistance markers. Variants carried by one or more susceptible isolate were excluded. For each mutation, the column “Unexplained Resistant Isolates” counts the number of SLID-R isolates lacking known resistance markers that carry the mutation. The columns “Sensitivity” and “Specificity” report the sensitivity and specificity of predicting drug resistance using only the mutation in the “Mutation” column. Separate sensitivity and specificity values were calculated for each SLID. Only SLID-S and unexplained SLID-R isolates were included.

| Gene                   | Mutation       | SLID | Sensitivity (%) | Specificity (%) | Unexplained Resistant Isolates |
|------------------------|----------------|------|-----------------|-----------------|--------------------------------|
| <i>Rv2815c-Rv2816c</i> | CT3122937C     | AMK  | 0.85            | 100             | 3                              |
| <i>thrB_prom</i>       | GAT-97G        | AMK  | 0.57            | 100             | 2                              |
| <i>pe_pgrs30</i>       | G1682-1683GC   | AMK  | 0.57            | 100             | 2                              |
| <i>Rv2815c_prom</i>    | G-61GA         | CAP  | 0.58            | 100             | 2                              |
| <i>ppe23</i>           | F248S          | CAP  | 0.58            | 100             | 2                              |
| <i>pe_pgrs30</i>       | G1682-1683GC   | CAP  | 0.58            | 100             | 2                              |
| <i>pe_pgrs57</i>       | ACCG2072-2074A | KAN  | 1.34            | 100             | 4                              |
| <i>Rv0988</i>          | L191A          | KAN  | 1.34            | 100             | 4                              |
| <i>pe_pgrs54</i>       | D1579T         | KAN  | 1.34            | 100             | 4                              |

224

225 Several genes have previously been suggested to affect SLID-R. Support vector machine  
 226 approach identified variants in three genes as potential determinants of XDR phenotype: *vapC21*,  
 227 *Rv3471c*, and *Rv3848*<sup>21</sup>. Comparative proteomics suggested 12 genes may be involved in

228 resistance to AMK or KAN: *atpA*, *tig*, *lpdC*, *tuf*, *moxR1*, *Rv2005c*, *35kd\_ag*, *prcA*, *Rv0148*, *bfrA*,  
229 *bfrB*, *hspX*<sup>22</sup>. Efflux pump *Rv1258c*<sup>32</sup>, transcriptional regulator *whiB7*<sup>33</sup>, and virulence gene  
230 *whiB6*<sup>34</sup> have also been associated with SLID-resistance. However, no individual variant within  
231 these 18 genes was present in more than one AMK-R or CAP-R isolate, after removing variants  
232 present in at least one susceptible isolate (Table S5). Variants present in one or more susceptible  
233 isolates also did not significantly associate with resistance in this isolate set. There were however  
234 eleven unique mutations within the *whiB7* gene and its promoter, each carried by a separate  
235 unexplained KAN-R isolate, and no other isolates (Table S5). *WhiB7* regulates *eis*<sup>35</sup>, which is in  
236 turn associated with KAN-R.

#### 237 *WhiB7 Variants in Aggregate Associate with Kanamycin Resistance*

238 Different variants in the same gene can cause the same change in phenotype<sup>36</sup>. If multiple  
239 rare variants in the same gene cause resistance, they may be missed by a genome wide  
240 association study on individual variants. To account for this, we measured the association  
241 between SLID-R and the variants in each *M. tuberculosis* gene in aggregate (Table 8). For each  
242 gene we identified all variants carried exclusively by resistant isolates, then counted the number  
243 of unexplained resistant isolates that carried at least one such variant in that gene (Table 8). No  
244 gene had more than 10 such isolates. To estimate how frequently mutations in the gene  
245 putatively cause unexplained resistance, this count was then divided by the total number of  
246 unexplained resistant isolates with any variant in that gene. For KAN, the *whiB7* promoter had  
247 the strongest signal, with seven unexplained KAN-R isolates carrying resistance-exclusive  
248 mutations (Table 8, Table S5). Each of the seven isolates carried a different *whiB7* promoter  
249 mutation, unique to that isolate. Meanwhile, five unexplained CAP-R isolates carried CAP-R  
250 exclusive mutations in the *thrB* promoter (Table 8). Mutations in the *thrB* promoter showed a

251 similar signal for AMK-R, as did mutations in *ppe51* (Table 8). Beyond the top three genes and  
 252 promoters, the proportion values for all three SLIDs dropped off noticeably.

253 **Table 8. Gene-based genome-wide association study, top genes.** “Number of Unexplained Resistant  
 254 Isolates with Resistance-Exclusive Mutations” for each SLID and each gene counts the number of isolates  
 255 that have unexplained resistance to that SLID and carry a mutation in that gene which is not carried by  
 256 any isolate susceptible to that SLID. Genes below the mean for this count were removed (4 for AMK, 5  
 257 for CAP, and 3 for KAN). “Total Number of Unexplained Resistant Isolates with Mutations in the Gene”  
 258 for each gene and each SLID counts the number of isolates that have unexplained resistance to that SLID  
 259 and carry any mutation in that gene. “Proportion” is the first count divided by the second. Genes  
 260 associated with first-line drug resistance were excluded.

| Gene               | SLID | Number of Unexplained Resistant Isolates with Resistance-Exclusive Mutations | Total Number of Unexplained Resistant Isolates with Mutations in the Gene | Proportion | Number of Unique Resistance-Exclusive Mutations in Unexplained Resistant Isolates | Number of Isolates with Resistance-Exclusive Mutations Carried by Unexplained Resistant Isolates |
|--------------------|------|------------------------------------------------------------------------------|---------------------------------------------------------------------------|------------|-----------------------------------------------------------------------------------|--------------------------------------------------------------------------------------------------|
| <i>thrB_prom</i>   | AMK  | 4                                                                            | 5                                                                         | 0.8        | 24                                                                                | 25                                                                                               |
| <i>ppe51</i>       | AMK  | 4                                                                            | 5                                                                         | 0.8        | 6                                                                                 | 9                                                                                                |
| <i>fadD29</i>      | AMK  | 4                                                                            | 6                                                                         | 0.66       | 4                                                                                 | 4                                                                                                |
| <i>Rv2680_prom</i> | CAP  | 7                                                                            | 7                                                                         | 1          | 15                                                                                | 8                                                                                                |
| <i>cysG_prom</i>   | CAP  | 5                                                                            | 7                                                                         | 0.71       | 26                                                                                | 17                                                                                               |
| <i>thrB_prom</i>   | CAP  | 5                                                                            | 8                                                                         | 0.62       | 30                                                                                | 29                                                                                               |
| <i>whiB7_prom</i>  | KAN  | 7                                                                            | 7                                                                         | 1          | 7                                                                                 | 13                                                                                               |
| <i>cyp142</i>      | KAN  | 5                                                                            | 5                                                                         | 1          | 5                                                                                 | 6                                                                                                |
| <i>accE5</i>       | KAN  | 4                                                                            | 5                                                                         | 0.8        | 13                                                                                | 21                                                                                               |

261

262

## 263 Discussion

264 While known markers in *eis* promoter and *rrs* associated strongly with SLID-R, 111  
265 SLID-R isolates lacked known markers in this study of 1184 clinical *M. tuberculosis* isolates.  
266 Some of the discordant isolates may be due to errors in phenotypic DST. Phenotypic/genotypic  
267 DST results sometimes disagree<sup>37</sup> and have shown an error rate as high as 2.2% for AMK<sup>38</sup>.  
268 These discordant isolates could also suggest the existence of rare, alternative mechanisms of  
269 resistance. However, identifying rare mechanisms is difficult, as no single variant is carried by  
270 enough isolates for a strong association with resistance. To overcome this difficulty, we searched  
271 for rare mechanisms using a gene-based approach.

272 The known marker *rrs*:A1401G was ubiquitous and strongly associated with cross-  
273 resistance to all three SLIDs (Figure 2). However, while the variant was carried by 246 CAP-R  
274 isolates, it was also carried by 22 CAP-S isolates (Table 4). The discordant isolates may still  
275 have low level resistance to CAP, as a prior study reported a wide range of CAP MIC values (8  
276 to 40 µg/ml) among clinical isolates carrying *rrs*:A1401G<sup>39</sup>. However, the cause of this variable  
277 MIC is still unknown. The same study reported that mutagenesis of reference strains consistently  
278 resulted in a 40 µg/ml CAP MIC, suggesting the inconsistency was due to the genetic  
279 background of the clinical isolates rather than the mechanism of *rrs*:A1401G itself<sup>39</sup>. However,  
280 we observed no mutations common to the genetic background of our 22 discordant isolates.

281 The known marker *rrs*:G1484T was rare, carried by only four clinical isolates (Table 4),  
282 all cross-resistant. The low prevalence of *rrs*:G1484T has been reported previously, despite a  
283 high MIC<sup>14,40</sup>. In a mutagenesis study on *M. smegmatis*, *rrs*:G1484T mutants grew slower than  
284 *rrs*:A1401G mutants, suggesting this rarity is due to a fitness cost of *rrs*:G1484T<sup>41</sup>. However, a  
285 later study found that *rrs*:G1484T conferred no growth disadvantage to the *M. tuberculosis*



286 reference strain H37Rv, though it did confer a disadvantage to a strain of the Beijing F2  
287 sublineage<sup>39</sup>. The full extent of the fitness cost of *rrs*:G1484T across clinical isolates is  
288 unknown.

289 While *eis* promoter mutations are generally known to cause KAN-R, mutagenesis  
290 experiments have shown that the *eis* promoter mutation *eis*:C-14T reduces susceptibility to AMK  
291 as well<sup>15,42,43</sup>. In 7H10 media, *eis*:C-14T mutants previously had MIC values (3 mg/L)<sup>15</sup> between  
292 the current and previous WHO approved critical concentrations (2 mg/L and 4 mg/L,  
293 respectively)<sup>44</sup>. In our study DST were performed on MGIT at the unchanged critical  
294 concentration for that media (1 mg/L) and gave inconsistent results for isolates with *eis*:C-14T  
295 (11 AMK-R and 18 AMK-S, Table 3). These inconsistent results are likely due to the critical  
296 concentration's proximity to the MIC of this variant. Though the genetic background of the  
297 different isolates could also be involved through epistatic effects.

298 KAN-R was most often explained by *rrs*:A1401G (Table 4), except among isolates from  
299 Moldova, which were enriched for known markers in the *eis* promoter (Table 5). Moldova is  
300 representative of countries in the region of the former Soviet Union, where this geographic trend  
301 has been reported previously<sup>16</sup>. The prevalence of *eis* promoter mutations in the region is thought  
302 to be the result of extensive use of KAN<sup>16</sup>.

303 While known markers in *eis* promoter and *rrs* associated strongly with resistance, no  
304 other mutations within these genes significantly associated with SLID-R in this isolate set  
305 (Figure 3). The mutation *rrs*:C1402T was infrequent and carried by both resistant and susceptible  
306 isolates (Figure 3). Mutagenesis has previously shown that *rrs*:C1402T reduces susceptibility to  
307 a level near the critical concentration<sup>39</sup>. Both AMK-R and AMK-S isolates carried *rrs*:C1402T in

308 a recent WHO study<sup>43</sup>, and the marker is considered resistant by the GenoType MTBDRsl  
309 platform (Hain Lifescience).

310 The streptomycin resistance marker *rrs*:A514C was enriched among isolates with the  
311 known SLID-R marker *rrs*:A1401G (OR = 6.0,  $p = 2.424e-11$ , Fisher's Exact Test).  
312 Streptomycin has previously been widely used in treatment regimens when first-line antibiotics  
313 fail<sup>2</sup>. It is thus likely that the association between these two variants is due to past use of  
314 streptomycin on MDR-TB strains that were later treated with SLIDs.

315 The known *eis* promoter and *rrs* mutations (Table 1) were not carried by 21 of the 270  
316 KAN-R isolates (Table 3), leaving the genetic basis of their resistance unexplained. Of these,  
317 seven isolates carried *whiB7* promoter mutations (Table 8, S5), though these mutations were  
318 unique in each isolate. Thus, while no single *whiB7* promoter mutation associated strongly with  
319 KAN-R, their aggregate signal suggests *whiB7* promoter mutations are an alternative mechanism  
320 of KAN-R. This finding in clinical isolates is supported by prior mutagenesis experiments.  
321 Increased expression of *whiB7* causes low level streptomycin and KAN-R in H37Rv mutants<sup>33</sup>,  
322 while deletion of *whiB7* in *Mycobacterium abscessus* lowers MIC to erythromycin, tetracycline,  
323 streptomycin, and AMK<sup>46</sup>. The *whiB7* gene encodes a transcriptional activator that regulates  
324 ribosome protection and efflux pump genes<sup>46</sup>. Moreover, *whiB7* regulates *eis*, providing it a  
325 plausible mechanism for KAN-R<sup>33</sup>.

326 Similarly, mutations in the gene *ppe51* collectively associated with AMK-R (Table 8).  
327 PPE51 mediates membrane transport and loss of function mutations in *ppe51* have recently been  
328 shown to cause resistance to the drug candidate 3,3-bis-di(methylsulfonyl)propionamide<sup>25</sup> and  
329 *ppe51* knockout increased susceptibility to pyrazinamide<sup>47</sup>. Mutations in *ppe51* have also been  
330 observed in an experimentally evolved CAP-R strain, though this strain also carried a *tlyA*

331 frameshift mutation<sup>48</sup>. The associated *ppe51* mutations in our data were not found in isolates  
332 with *tlyA* mutations, except for the ubiquitous synonymous mutation *tlyA*:L11L. The presence of  
333 *ppe51* mutations here in AMK-R isolates, in the absence of canonical markers or *tlyA* mutations,  
334 supports their potential role in resistance. Mutations in the *thrB* promoter also collectively  
335 associated with both AMK-R and CAP-R (Table 8). However, unlike *whiB7* and *ppe51*, *thrB*  
336 promoter mutations lack a plausible mechanism of resistance. ThrB is a homoserine kinase  
337 involved in threonine biosynthesis and is essential for virulence and *in vitro* growth<sup>49</sup>, but there is  
338 no known connection between this pathway and SLID-resistance.

339         The known SLID-R markers are accurate predictors of resistance. However, they still do  
340 not explain all SLID-R cases. Rare, alternative mechanisms, such as *whiB7* promoter mutations,  
341 are likely responsible for these unexplained SLID-R isolates. For molecular diagnostics to fully  
342 replace phenotypic diagnostics, these rare mechanisms must also be understood. Finding these  
343 rare mechanisms will require sequences from larger sets of unexplained resistant isolates, and  
344 more sensitive methods of association, such as the machine learning approaches employed  
345 previously<sup>21</sup> or the gene-based aggregate method employed here. This method independently  
346 corroborated the association between *whiB7* promoter mutations and KAN-R<sup>46</sup>, and identified a  
347 new association between AMK-R and mutations in *ppe51*, a gene previously implicated in  
348 resistance to other compounds<sup>25,47,48</sup>.

349

## 350 **Materials and Methods**

### 351 *Sample Collection*

352         As part of a previous study, 323 clinical *M. tuberculosis* isolates were collected for long  
353 read PacBio sequencing<sup>18</sup>. There were 89 isolates that originated from Hinduja National Hospital

354 (PDHNNH) in Mumbai, India, 89 that came from the Phthisiopneumology Institute (PPI) in  
355 Chisinau, Moldova, 48 which were from the Tropical Disease Foundation (TDF) in Manila,  
356 Philippines, and 97 that were from the National Health Laboratory Service of South Africa  
357 (NHLS) in Johannesburg, South Africa. All raw sequences were uploaded to NCBI's sequence  
358 read archive (SRA) database under the Bioproject accession PRJNA353873. An additional 10 *M.*  
359 *tuberculosis* clinical isolates were collected from the Supranational Reference Laboratories in  
360 Stockholm and Antwerp. These isolates were originally genotyped with a Hain Lifescience  
361 Genotype MTBDRsl line probe assay<sup>9</sup>, and were chosen for sequencing due to discordance  
362 between their genotype and phenotypic DST for any SLID. Another 851 whole genome  
363 sequences were downloaded from NCBI's SRA database using SRA Toolkit's fastqdump<sup>50</sup>.  
364 These 851 downloaded raw reads were previously sequenced on Illumina short read platforms<sup>51-</sup>  
365 <sup>54</sup>.

### 366 *Phenotypic Drug-susceptibility Testing*

367 DST for the PacBio sequenced isolates was performed on the BACTEC mycobacterial  
368 growth indicator tube (MGIT) 960 platform (BD Diagnostic Systems, Franklin Lakes, NJ, USA)  
369 using the 2008 WHO recommended critical concentration of 1.0 mg/L (AMK) and 2.5 mg/L  
370 (CAP/KAN) as described in previous studies<sup>18,55,56</sup>. DST for Illumina sequenced isolates were  
371 also tested on MGIT 960 using contemporary WHO recommended critical concentrations, as  
372 described previously<sup>51-54</sup>. As of 2018, the recommended critical concentrations for AMK, CAP,  
373 and KAN remains 1.0 mg/L, 2.5 mg/L, and 2.5 mg/L, respectively<sup>44</sup>. Bacterial isolates were  
374 excluded from analysis if DST data was not available for at least one SLID.

### 375 *DNA Extraction and Sequencing*

376 The DNA of all 333 isolates collected for long-read PacBio sequencing, including those  
377 from the WHO Supranational Reference Laboratories in Stockholm and Antwerp, and from  
378 NCBI's SRA database were extracted as described in a previous study<sup>57</sup>. The SMRT sequencing  
379 protocol was described previously<sup>58,59</sup>. 64 isolates were later re-sequenced due to low coverage.  
380 DNA extraction for the 851 downloaded public genomes was previously described<sup>51-54</sup>. The  
381 downloaded genomes were sequenced on Illumina Genome Analyzer, MiSeq, or HiSeq  
382 platforms.

### 383 *Genome Assembly, Alignment and Variant Calling*

384 Genome assembly, alignment, and variant calling methods are described in  
385 Supplementary Information. Briefly, PBHoover<sup>60</sup> aligned 64 SMRT sequenced isolates to  
386 H37Rv and called variants. Later, 269 SMRT sequenced isolates were de novo assembled with  
387 canu<sup>61</sup> or HGAP2 ([https://github.com/PacificBiosciences/Bioinformatics-Training/wiki/HGAP-](https://github.com/PacificBiosciences/Bioinformatics-Training/wiki/HGAP-2.0)  
388 [2.0](https://github.com/PacificBiosciences/Bioinformatics-Training/wiki/HGAP-2.0)) then their assembled genomes were aligned to reference strain H37Rv using dnadiff (v1.3)<sup>62</sup>  
389 for variant calling, with the output converted to VCF format by a custom script, mummer-  
390 snps2vcf (<https://gitlab.com/LPCDRP/mummer-extras/-/blob/master/src/mummer-snps2vcf>).  
391 Reads from Illumina sequenced isolates were aligned to H37Rv using bowtie2 (v2.2.4)<sup>63</sup>, then  
392 variants were called with VarScan2 (v2.3)<sup>64</sup>.

### 393 *Lineage Identification*

394 MIRU-VNTR and spoligotyping were previously performed on the initial 323 SMRT  
395 sequenced isolates collected<sup>55</sup>. The ten isolates sent from Stockholm and Antwerp, and the 851  
396 downloaded Illumina sequenced isolates, underwent MIRU-VNTR and spoligotyping with  
397 MiruHero, a custom Python script (<https://gitlab.com/LPCDRP/miru-hero>). MiruHero used the  
398 rule based criteria from TB-Insight<sup>65</sup> to classify lineages.

399 *Identifying Known Resistance Conferring Mutations*

400           After variant calling, known SLID-R markers were searched for in the VCF file of each  
401 clinical isolate. The *eis* promoter mutations C-14T, C-12T, and G-10A are known KAN-R  
402 markers, and the *rrs* mutations G1484T and A1401G are known resistance markers to all three  
403 SLIDs<sup>18</sup>. The genomic positions and orientation of *rrs* and the *eis* promoter were noted in Table  
404 S6<sup>66</sup>. Known markers and phenotypic DST were used to estimate the sensitivity and specificity  
405 of predicting resistance to each SLID using known markers. A 95% confidence interval was  
406 calculated for sensitivity and specificity estimates using the score method with continuity  
407 correction<sup>28</sup>.

408 *Genome Wide Association*

409           For each of the three drugs, separate genome wide association studies were performed  
410 using a custom Python script (<https://gitlab.com/LPCDRP/gwa>) to identify novel markers for  
411 alternative mechanisms of resistance. To remove the overriding signal of known resistance  
412 markers, our GWAS excluded isolates that had their resistance explained by known markers  
413 (Table 1). This exclusion was necessary to avoid confounding associations with potential  
414 alternative mechanisms of resistance. Isolates with additional *eis* promoter resistance markers  
415 (Table 1) were excluded in our KAN-R analysis for similar reasons. We calculated the sensitivity  
416 and specificity of each variant's prediction of resistance to each SLID (the proportion of  
417 unexplained resistant isolates with the variant, and proportion of susceptible isolates without the  
418 variant, respectively). For each SLID we identified variants absent from susceptible isolates and  
419 ranked them by the number of unexplained resistant isolates that carried them. The same  
420 protocol was performed using a subset of genes previously implicated in SLID-R.

421           In the gene-based association, for each SLID and each gene we counted the number of  
422 unexplained resistant isolates with at least one variant in that gene that was absent from isolates  
423 susceptible to that SLID. Genes below the mean for this count were removed. This count was  
424 then divided by the total number of unexplained resistant isolates with any variant in that gene.  
425 Genes with known resistance markers to first line drugs were excluded, as most SLID-R isolates  
426 are also resistant to first-line drugs due to prior treatment with first-line drug regimens.

427

#### 428 **Supplementary Information Availability**

429 Supplementary Tables, Figures, and methods are available at  
430 <https://doi.org/10.5281/zenodo.5720106>.

#### 431 **Acknowledgements**

432 Phenotypic confirmation of ten isolates without common molecular mechanisms of resistance  
433 was performed by Mr. Solomon Ghebremichael in the Department of Microbiology at the Public  
434 Health agency of Sweden in Stockholm.

#### 435 **Funding**

436 This project was funded by a grant (R01AI105185) from the National Institute of Allergy and  
437 Infectious diseases.

438

## References

- 439 1. World Health Organization, (WHO). *GLOBAL TUBERCULOSIS REPORT 2021*.
- 440 2. World Health Organization. *Global Tuberculosis Report 2019*. (2019)  
441 doi:WHO/CDS/TB/2019.15.
- 442 3. World Health Organization. *Companion handbook to the WHO guidelines for the*  
443 *programmatic management of drug-resistant tuberculosis*. World Health Organization  
444 (WHO, Geneva, 2014). doi:WHO/HTM/TB/2014.11.
- 445 4. Palomino, J. & Martin, A. Drug Resistance Mechanisms in Mycobacterium tuberculosis.  
446 *Antibiotics* **3**, 317–340 (2014).
- 447 5. Engström, A., Perskvist, N., Werngren, J., Hoffner, S. E. & Juréen, P. Comparison of  
448 clinical isolates and in vitro selected mutants reveals that tlyA is not a sensitive genetic  
449 marker for capreomycin resistance in Mycobacterium tuberculosis. *J. Antimicrob.*  
450 *Chemother.* **66**, 1247–1254 (2011).
- 451 6. Seddon, J. A. *et al.* Hearing loss in patients on treatment for drug-resistant tuberculosis.  
452 *Eur. Respir. J.* **40**, 1277–1286 (2012).
- 453 7. World Health Organization. Rapid Communication : key changes to treatment of  
454 multidrug- and rifampicin-resistant tuberculosis. *World Heal. Organ.* 1–7 (2018)  
455 doi:WHO/CDS/TB/2018.18.
- 456 8. World Health Organization. *Rapid Communication : Key changes to the treatment of*  
457 *drug-resistant tuberculosis*. (2019) doi:WHO/CDS/TB/2019.26.
- 458 9. Lacoma, A. *et al.* GenoType MTBDRsl for molecular detection of second-line-drug and  
459 ethambutol resistance in Mycobacterium tuberculosis strains and clinical samples. *J. Clin.*  
460 *Microbiol.* **50**, 30–36 (2012).



- 461 10. Coll, F. *et al.* Genome-wide analysis of multi- and extensively drug-resistant. (2018)  
462 doi:10.1038/s41588-017-0029-0.
- 463 11. Kambli, P. *et al.* Correlating rrs and eis promoter mutations in clinical isolates of  
464 Mycobacterium tuberculosis with phenotypic susceptibility levels to the second-line  
465 injectables. *Int. J. mycobacteriology* **5**, 1–6 (2016).
- 466 12. Brossier, F. *et al.* Molecular investigation of resistance to second-line injectable drugs in  
467 multidrug-resistant clinical isolates of Mycobacterium tuberculosis in France. *Antimicrob.*  
468 *Agents Chemother.* **61**, (2017).
- 469 13. Jugheli, L. *et al.* High level of cross-resistance between kanamycin, amikacin, and  
470 capreomycin among Mycobacterium tuberculosis isolates from Georgia and a close  
471 relation with mutations in the rrs gene. *Antimicrob. Agents Chemother.* **53**, 5064–5068  
472 (2009).
- 473 14. Perdigão, J. & Portugal, I. Genetics and roadblocks of drug resistant tuberculosis. *Infect.*  
474 *Genet. Evol.* **72**, 113–130 (2019).
- 475 15. Zaunbrecher, M. A., Sikes Jr, R. D., Metchock, B., Shinnick, T. M. & Posey, J. E.  
476 Overexpression of the chromosomally encoded aminoglycoside acetyltransferase eis  
477 confers kanamycin resistance in Mycobacterium tuberculosis. *Proc. Natl. Acad. Sci. U. S.*  
478 *A.* **106**, 20004–20009 (2009).
- 479 16. Gikalo, M. B., Nosova, E. Y., Krylova, L. Y. & Moroz, A. M. The role of eis mutations in  
480 the development of kanamycin resistance in Mycobacterium tuberculosis isolates from the  
481 Moscow region. *J. Antimicrob. Chemother.* **67**, 2107–2109 (2012).
- 482 17. Pricer, R. E., Houghton, J. L., Green, K. D., Mayhoub, A. S. & Garneau-Tsodikova, S.  
483 Biochemical and structural analysis of aminoglycoside acetyltransferase Eis from

- 484 Anabaena variabilis. *Mol. Biosyst.* **8**, 3305–3313 (2012).
- 485 18. Rodwell, T. C. *et al.* Predicting extensively drug-resistant Mycobacterium tuberculosis  
486 phenotypes with genetic mutations. *J. Clin. Microbiol.* **52**, 781–789 (2014).
- 487 19. Maus, C. E., Plikaytis, B. B., Thomas, M. & Shinnick, T. M. Mutation of tlyA Confers  
488 Capreomycin Resistance in Mycobacterium tuberculosis. *Antimicrob. Agents Chemother.*  
489 **49**, 571–577 (2005).
- 490 20. Köser, C. U., Bryant, J. M., Parkhill, J. & Peacock, S. J. Consequences of whiB7  
491 (Rv3197A) Mutations in Beijing Genotype Isolates of the Mycobacterium tuberculosis  
492 Complex. *Antimicrob. Agents Chemother.* **57**, 3461 LP – 3461 (2013).
- 493 21. Kavvas, E. S. *et al.* Machine learning and structural analysis of Mycobacterium  
494 tuberculosis pan-genome identifies genetic signatures of antibiotic resistance. *Nat.*  
495 *Commun.* (2018) doi:10.1038/s41467-018-06634-y.
- 496 22. Sharma, D. *et al.* Comparative proteomic analysis of aminoglycosides resistant and  
497 susceptible mycobacterium tuberculosis clinical isolates for exploring potential drug  
498 targets. *PLoS One* **10**, 1–18 (2015).
- 499 23. Sharma, D. *et al.* M. tuberculosis ferritin (Rv3841): Potential involvement in Amikacin  
500 (AK) & Kanamycin (KM) resistance. *Biochem. Biophys. Res. Commun.* **478**, 908–912  
501 (2016).
- 502 24. Johansen, S. K., Maus, C. E., Plikaytis, B. B. & Douthwaite, S. Capreomycin Binds across  
503 the Ribosomal Subunit Interface Using tlyA-Encoded 2'-O-Methylations in 16S and 23S  
504 rRNAs. *Mol. Cell* **23**, 173–182 (2006).
- 505 25. Wang, Q. *et al.* PE/PPE proteins mediate nutrient transport across the outer membrane of  
506 Mycobacterium tuberculosis. *Science (80-. )*. **367**, 1147 LP – 1151 (2020).

- 507 26. Tyler, A. D. *et al.* Comparison of sample preparation methods used for the next-  
508 generation sequencing of mycobacterium tuberculosis. *PLoS One* **11**, 1–14 (2016).
- 509 27. Coll, F. *et al.* Genome-wide analysis of multi- and extensively drug-resistant  
510 Mycobacterium tuberculosis. *Nat. Genet.* **50**, 307–316 (2018).
- 511 28. Newcombe, R. G. Two-sided confidence intervals for the single proportion: comparison of  
512 seven methods. *Stat. Med.* **17**, 857–872 (1998).
- 513 29. Wang, Y. *et al.* The roles of rpsL, rrs, and gidB mutations in predicting streptomycin-  
514 resistant drugs used on clinical Mycobacterium tuberculosis isolates from Hebei Province,  
515 China. *Int. J. Clin. Exp. Pathol.* **12**, 2713–2721 (2019).
- 516 30. Gikalo, M. B., Nosova, E. Y., Krylova, L. Y. & Moroz, A. M. The role of eis mutations in  
517 the development of kanamycin resistance in Mycobacterium tuberculosis isolates from the  
518 moscow region. *J. Antimicrob. Chemother.* **67**, 2107–2109 (2012).
- 519 31. Li, Q. *et al.* Mutation and transmission profiles of second-line drug resistance in clinical  
520 isolates of drug-resistant mycobacterium tuberculosis from hebei province, China. *Front.*  
521 *Microbiol.* **10**, 1–12 (2019).
- 522 32. Cloete, R., Kapp, E., Joubert, J., Christoffels, A. & Malan, S. F. Molecular modelling and  
523 simulation studies of the Mycobacterium tuberculosis multidrug efflux pump protein  
524 Rv1258c. *PLoS One* **13**, e0207605 (2018).
- 525 33. Reeves, A. Z. *et al.* Aminoglycoside cross-resistance in Mycobacterium tuberculosis due  
526 to mutations in the 5' untranslated region of whiB7. *Antimicrob. Agents Chemother.* **57**,  
527 1857–1865 (2013).
- 528 34. Farhat, M. R. *et al.* GWAS for quantitative resistance phenotypes in Mycobacterium  
529 tuberculosis reveals resistance genes and regulatory regions. *Nat. Commun.* **10**, 2128

- 530 (2019).
- 531 35. Burian, J. *et al.* The mycobacterial antibiotic resistance determinant WhiB7 acts as a  
532 transcriptional activator by binding the primary sigma factor SigA (RpoV). *Nucleic Acids*  
533 *Res.* **41**, 10062–10076 (2013).
- 534 36. Oppong, Y. E. A. *et al.* Genome-wide analysis of *Mycobacterium tuberculosis*  
535 polymorphisms reveals lineage-specific associations with drug resistance. *BMC Genomics*  
536 **20**, 252 (2019).
- 537 37. Hillemann, D. *et al.* First evaluation after implementation of a quality control system for  
538 the second line drug susceptibility testing of *Mycobacterium tuberculosis* joint efforts in  
539 low and high incidence countries. *PLoS One* **8**, e76765–e76765 (2013).
- 540 38. Nikolayevskyy, V. *et al.* External Quality Assessment for Tuberculosis Diagnosis and  
541 Drug Resistance in the European Union: A Five Year Multicentre Implementation Study.  
542 *PLoS One* **11**, e0152926 (2016).
- 543 39. Reeves, A. Z., Campbell, P. J., Willby, M. J. & Posey, J. E. Disparities in capreomycin  
544 resistance levels associated with the *rrs* A1401G mutation in clinical isolates of  
545 *mycobacterium tuberculosis*. *Antimicrob. Agents Chemother.* **59**, 444–449 (2015).
- 546 40. Georghiou, S. B. *et al.* Evaluation of genetic mutations associated with mycobacterium  
547 tuberculosis resistance to amikacin, kanamycin and capreomycin: A systematic review.  
548 *PLoS One* **7**, (2012).
- 549 41. Shcherbakov, D. *et al.* Directed mutagenesis of mycobacterium smegmatis 16S rRNA to  
550 reconstruct the in vivo evolution of aminoglycoside resistance in mycobacterium  
551 tuberculosis. *Mol. Microbiol.* **77**, 830–840 (2010).
- 552 42. Pholwat, S. *et al.* *eis* Promoter C14G and C15G Mutations Do Not Confer Kanamycin

- 553 Resistance in *Mycobacterium tuberculosis*. *Antimicrob. Agents Chemother.* **60**, 7522–  
554 7523 (2016).
- 555 43. World Health Organization (WHO). *Catalogue of mutations in *Mycobacterium**  
556 *tuberculosis complex and their association with drug resistance*.  
557 <https://www.who.int/publications/i/item/9789240028173> (2021) doi:ISBN:  
558 9789240028173.
- 559 44. World Health Organization, (WHO). Technical report on critical concentrations for TB  
560 drug susceptibility testing of medicines used in the treatment of drug-resistant TB. *Who*  
561 106 (2018).
- 562 45. Malinga, L., Brand, J., Olorunju, S., Stoltz, A. & van der Walt, M. Molecular analysis of  
563 genetic mutations among cross-resistant second-line injectable drugs reveals a new  
564 resistant mutation in *Mycobacterium tuberculosis*. *Diagn. Microbiol. Infect. Dis.* **85**, 433–  
565 437 (2016).
- 566 46. Hurst-Hess, K., Rudra, P. & Ghosh, P. *Mycobacterium abscessus* WhiB7 Regulates a  
567 Species-Specific Repertoire of Genes To Confer Extreme Antibiotic Resistance.  
568 *Antimicrob. Agents Chemother.* **61**, e01347-17 (2017).
- 569 47. Bellerose, M. M. *et al.* Common Variants in the Glycerol Kinase Gene Reduce  
570 Tuberculosis Drug Efficacy. *MBio* **10**, (2019).
- 571 48. Zhao, J. *et al.* Assessing capreomycin resistance on tlyA deficient and point mutation  
572 (G695A) *Mycobacterium tuberculosis* strains using multi-omics analysis. *Int. J. Med.*  
573 *Microbiol.* **309**, 151323 (2019).
- 574 49. Hasenoehrl, E. J. *et al.* Derailing the aspartate pathway of *Mycobacterium tuberculosis* to  
575 eradicate persistent infection. *Nat. Commun.* doi:10.1038/s41467-019-12224-3.

- 576 50. Leinonen, R., Sugawara, H. & Shumway, M. The sequence read archive. *Nucleic Acids*  
577 *Res.* **39**, 2010–2012 (2011).
- 578 51. Walker, T. M. *et al.* Whole-genome sequencing for prediction of Mycobacterium  
579 tuberculosis drug susceptibility and resistance: A retrospective cohort study. *Lancet Infect.*  
580 *Dis.* **15**, 1193–1202 (2015).
- 581 52. Casali, N. *et al.* Microevolution of extensively drug-resistant tuberculosis in Russia.  
582 *Genome Res.* (2012) doi:10.1101/gr.128678.111.
- 583 53. Casali, N. *et al.* Evolution and transmission of drug-resistant tuberculosis in a Russian  
584 population. *Nat. Genet.* **46**, 279–286 (2014).
- 585 54. Chernyaeva, E. N. *et al.* Genome-wide Mycobacterium tuberculosis variation (GMTV)  
586 database: a new tool for integrating sequence variations and epidemiology. *BMC*  
587 *Genomics* **15**, 308 (2014).
- 588 55. Garfein, R. S. *et al.* Phenotypic and genotypic diversity in a multinational sample of drug-  
589 resistant Mycobacterium tuberculosis isolates. *Int J Tuberc Lung Dis* **19**, 420–7 (2015).
- 590 56. Who. Policy guidance on drug-susceptibility testing ( DST ) of second-line  
591 antituberculosis drugs World Health Organization. *World Health* 1–20 (2008).
- 592 57. Helden, P. D. Van, Victor, T. C., Warren, R. M. & Helden, E. G. Van. Isolation of DNA  
593 from Mycobacterium tuberculosis. *Methods Mol. Med.* **54**, 19–29 (2001).
- 594 58. Torres, J. N. *et al.* Novel katG mutations causing isoniazid resistance in clinical M.  
595 tuberculosis isolates. *Emerg. Microbes Infect.* **4**, e42–e42 (2015).
- 596 59. Elghraoui, A., Modlin, S. S. J. S. & Valafar, F. SMRT genome assembly corrects  
597 reference errors, resolving the genetic basis of virulence in Mycobacterium tuberculosis.  
598 *BMC Genomics* **18**, 302 (2017).

- 599 60. Ramirez-Busby, S. M., Elghraoui, A., Kim, Y. B. & Valafar, F. PBHoover and  
600 CigarRoller: a method for confident haploid variant calling on legacy Pacific Biosciences  
601 data and its application to heterogeneous population analysis. *Bioinforma.* - *Under Rev.* 1–  
602 27 (2018) doi:10.1101/360370.
- 603 61. Koren, S. *et al.* Canu : scalable and accurate long- - - read assembly via adaptive k - - -  
604 mer weighting and repeat separation. 1–35 (2016) doi:10.1101/gr.215087.116.Freely.
- 605 62. Delcher, A. L. *et al.* Alignment of whole genomes. *Nucleic Acids Res.* **27**, 2369–2376  
606 (1999).
- 607 63. Langmead, B. & Salzberg, S. L. Fast gapped-read alignment with Bowtie 2. *Nat. Methods*  
608 **9**, 357–359 (2012).
- 609 64. Koboldt, D. C. *et al.* VarScan 2: somatic mutation and copy number alteration discovery  
610 in cancer by exome sequencing. *Genome Res.* **22**, 568–576 (2012).
- 611 65. Shabbeer, A. *et al.* TB-Lineage: An online tool for classification and analysis of strains of  
612 *Mycobacterium tuberculosis* complex. *Infect. Genet. Evol.* **12**, 789–797 (2012).
- 613 66. Kapopoulou, A., Lew, J. M. & Cole, S. T. The MycoBrowser portal: a comprehensive and  
614 manually annotated resource for mycobacterial genomes. *Tuberculosis (Edinb).* **91**, 8–13  
615 (2011).
- 616
